# Supplementary material for: DAPIT Over-Expression Modulates Glucose Metabolism and Cell Behaviour in HEK293T Cells
Source: PubMed Central journal article supplement (PMC4498893; doi:10.1371/journal.pone.0131990), 2015-07-10

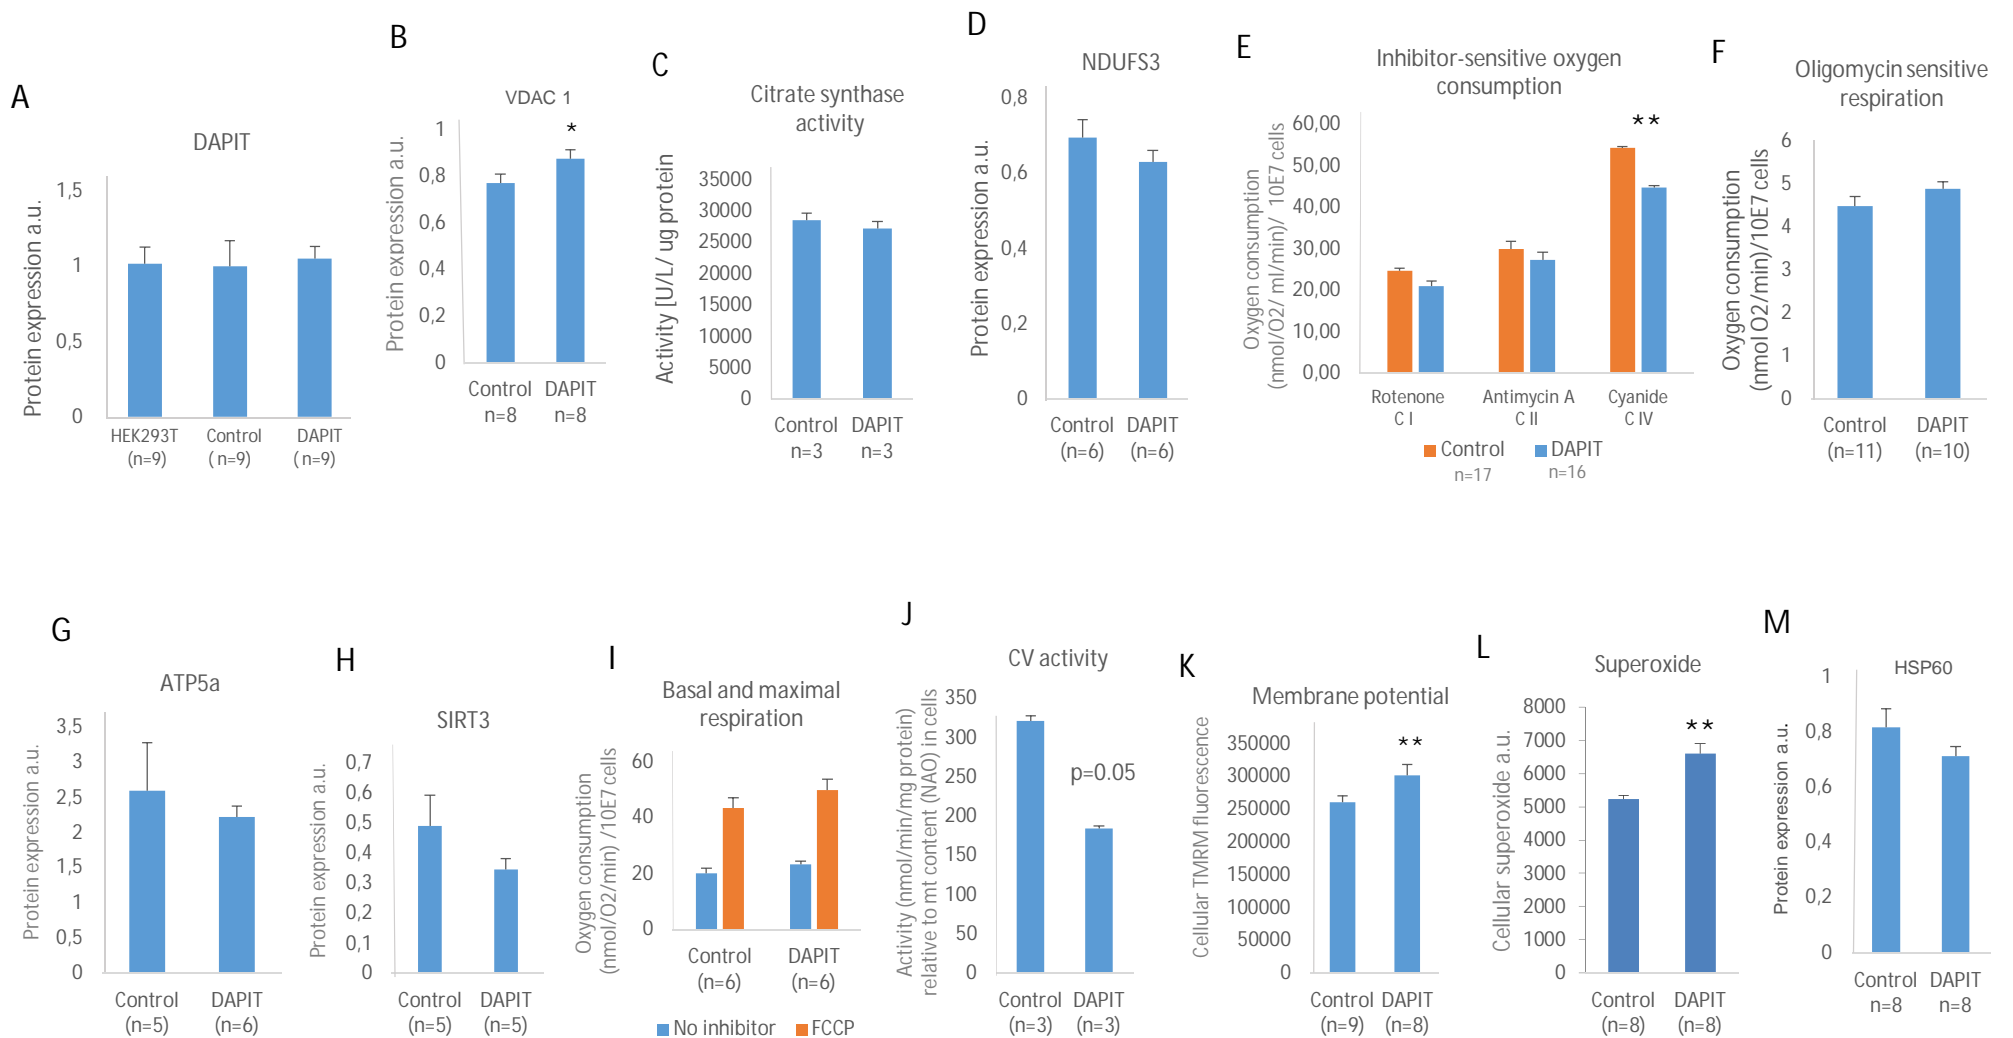

Supplement: pone.0131990.s001.pdf [file pone.0131990.s001.pdf]
